# Supplementary material for: A novel [60]fullerene-appended initiator for living cationic polymerization and its application to the synthesis of [60]fullerene-end-capped poly(vinyl ether)s
Source: Royal Society of Chemistry journal article supplement (doi:10.1039/c2py00522k), 2011-12-16
Supplement: c2py00522k.pdf [file c2py00522k.pdf]

## Supplementary Information

### **A Novel [60]Fullerene-Appended Initiator for Living Cationic Polymerization and its Application to the Synthesis of [60]Fullerene-End-Capped Poly(vinyl ether)s**

Jin Motoyanagi, Ryo Miyabara, Masashi Suzuki, Sadao Miki and Masahiko Minoda\*

*Department of Chemistry and Materials Technology, Graduate School of Science and Technology, Kyoto Institute of Technology, Matsugasaki, Sakyo-ku, Kyoto 606-8585, Japan.*

*E-mail: minoda@kit.ac.jp*

#### **Measurements.**

$^1\text{H}$  and  $^{13}\text{C}$  NMR spectra were recorded at 25 °C on a Bruker model AC-500 spectrometer, operating at 500 and 125 MHz, respectively, where chemical shifts ( $\delta$  in ppm) were determined with respect to non-deuterated solvent residues as internal standards. Matrix-assisted laser desorption/ionization time-of-flight mass spectrometry (MALDI-TOF-MS) was performed on an Applied Biosystems BioSpectrometry Workstation<sup>TM</sup> model Voyager-DE<sup>TM</sup> STR spectrometer using 9-nitroanthracene as a matrix. Preparative gel permeation chromatography (SEC) was performed at 25 °C by using 21.5 mm x 300 mm polystyrene gel columns (TOSOH TSKgel G2000H, G2500H and G3000H) on a TOSOH model CCPE equipped with RI-8022 RI detector. Analytical GPC was performed at 40 °C, using 8.0 mm x 300 mm polystyrene gel columns (Shodex KF-804 x 2) on a TOSOH model DP-8020 equipped with a UV-8000 variable-wavelength UV-vis detector and a RI-8022 RI detector. The number-average molecular weight ( $M_n$ ) and polydispersity ( $M_w/M_n$ ) ratio were calculated from the chromatographs with respect to 15 polystyrene standards (Scientific Polymer Products, Inc.;  $M_n$  = 580-670000,  $M_w/M_n$  = 1.01-1.07). UV-vis spectra were recorded on a SHIMADZU Type UV-2550 spectrometer.

## Materials.

Ethylene glycol mono vinyl ether (TCI, 95%), 1-(3-dimethylaminopropyl)-3-ethylcarbodiimide hydrochloride (TCI, 98%), 4-dimethylaminopyridine (DMAP; TCI, 98%), TFA (Wako, 98%) and ethylaluminum dichloride (EtAlCl<sub>2</sub>; Wako, 1.0 M in n-hexane) were used as received. Phenyl-C<sub>61</sub> butyric acid was prepared according to a literature<sup>1</sup> with some modifications. Isobutyl vinyl ether (**IBVE**; Aldrich, 99%) was dried overnight over KOH pellets, and distilled twice over CaH<sub>2</sub>. 2-Methoxyethyl vinyl ether (**MOVE**; Maruzen Petrochemical, 99.9%) was distilled twice over CaH<sub>2</sub> under reduced pressure. Anhydrous solvents for reactions were purchased from Kanto Chemicals.

## Preparation of C<sub>60</sub>VE.

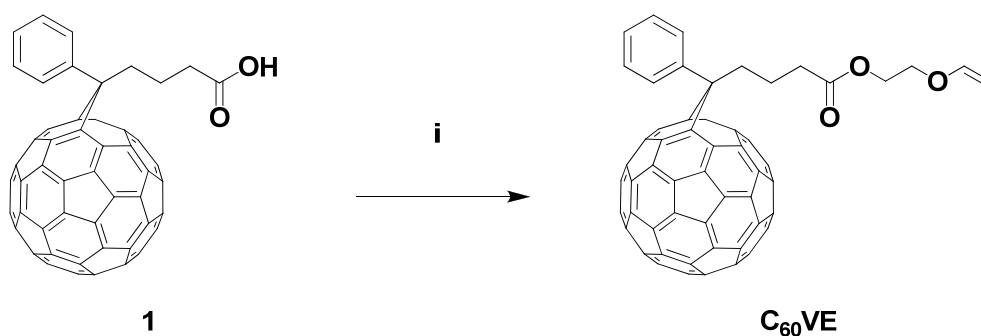

**Scheme 1** Reagents and conditions: (i) ethylene glycol mono vinyl ether, DMAP, 1-(3-dimethylaminopropyl)-3-ethylcarbodiimide hydrochloride, 1,2-dichlorobenzene, 25 °C.

**Compound C<sub>60</sub>VE.** To a 1,2-dichlorobenzene solution (45 mL) of a mixture of phenyl-C<sub>61</sub> butyric acid (**1**; 450 mg, 0.50 mmol), ethylene glycol mono vinyl ether (0.92 mL, 100 mmol) and DMAP (60 mg, 0.50 mmol) was added 1-(3-dimethylaminopropyl)-3-ethylcarbodiimide hydrochloride (190 mg, 1.0 mmol) and the mixture was stirred for 16 h at 25 °C under N<sub>2</sub>. The reaction mixture was washed with water, dried over Na<sub>2</sub>SO<sub>4</sub> and evaporated to dryness. The residue was chromatographed on SiO<sub>2</sub> with toluene as an eluent to allow isolation of **C<sub>60</sub>VE** as purple solid (445 mg, 0.46 mmol) in 91% yield. <sup>1</sup>H NMR (500 MHz, CDCl<sub>3</sub>): δ 7.98 (m, 2H), 7.55 (m, 2H), 7.43 (m, 1H), 6.46 (m, 2H), 4.28 (m, 2H), 4.19 (m, 1H), 4.05 (m, 1H), 3.85 (m, 2H), 2.17 (t, *J* = 7.5 Hz, 2H), 1.64 (m, 2H), 1.48 (m, 2H) ppm. <sup>13</sup>C NMR

<sup>1</sup> J. C. Hummelen, B. W. Knight, F. LePeq, F. Wudl, J. Yao and C. L. Wilkins, *J. Org. Chem.*, 1995, **60**, 532-538.

(125 MHz, CDCl<sub>3</sub>):  $\delta$  172.94, 151.49, 147.47, 146.54, 145.31, 144.91, 144.62, 144.37, 144.09, 143.88, 143.78, 143.69, 143.27, 143.22, 143.18, 143.14, 142.86, 142.62, 142.36, 142.26, 142.05, 142.01, 141.44, 141.16, 140.60, 139.89, 139.83, 138.93, 138.46, 138.30, 138.17, 138.04, 136.82, 135.19, 130.89, 130.65, 128.80, 127.89, 127.82, 87.26, 79.99, 65.81, 62.73, 61.09, 35.40, 34.02, 19.92. MALDI-TOF-MS: Calcd. for C<sub>75</sub>H<sub>19</sub>O<sub>3</sub> [M+H]<sup>+</sup>:  $m/z$  = 967.13; Found: 967.34.

### **Cationic polymerization of vinyl ether monomers with C<sub>60</sub>VE-TFA.**

The preparation of C<sub>60</sub>VE-TFA and polymerization of vinyl ether monomers were carried out under a dry nitrogen atmosphere in baked glass tubes equipped with a three-way stopcock. A typical example for the polymerization procedure is given below. To a toluene solution (3.8 mL) of C<sub>60</sub>VE (39 mg, 40  $\mu$ mol) was added 1 equivalent TFA (5.0 mM in toluene; 0.25 mL, 40  $\mu$ mol) at 0 °C under N<sub>2</sub>, and the mixture was stirred for 15 h at 0 °C under N<sub>2</sub>. And then, to the reaction mixture were added of prechilled toluene (2.6 mL), IBVE (0.52 mL, 4.0 mmol), dioxane (0.80 mL, 9.4 mmol) and EtAlCl<sub>2</sub> (in hexane, 1.0 M; 0.10 mL, 0.10 mmol) at 0 °C under N<sub>2</sub>. After stirring for 15 h, the polymerization was quenched with an excess of prechilled MeOH (1 mL) containing a small amount of NH<sub>3</sub> aq. The monomer conversion was determined by GC measurement. The quenched reaction mixture was poured into toluene and then washed with dil. HCl and water to remove the aluminum-containing residues, and evaporated to dryness under reduced pressure. The residue was subjected to preparative GPC, where the first band was collected and evaporated to dryness to give C<sub>60</sub>-PIBVE as purple oil.

### Characterization of C<sub>60</sub>-PMOVE.

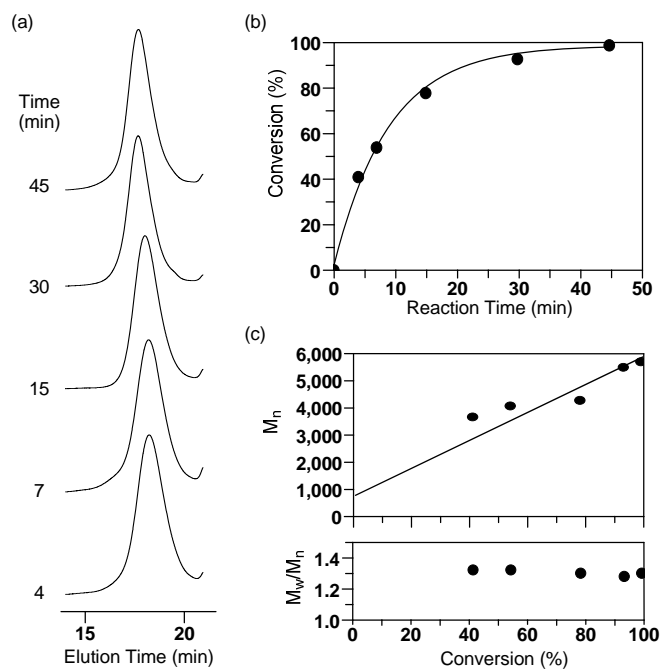

**Fig. S1.** (a) SEC curves of C<sub>60</sub>-PMOVE using THF as the eluent, (b) time-conversion curve for the polymerization of MOVE and (c) M<sub>n</sub> and M<sub>w</sub>/M<sub>n</sub> value of C<sub>60</sub>-PMOVE plotted against monomer conversion. Polymerization was conducted with C<sub>60</sub>VE-TFA/EtAlCl<sub>2</sub>/dioxane in toluene at 0 °C ([MOVE]<sub>0</sub> = 500 mM, [EtAlCl<sub>2</sub>]<sub>0</sub> = 12.5 mM, [dioxane]<sub>0</sub> = 1.2 M, [C<sub>60</sub>VE-TFA]<sub>0</sub> = 5.0 mM).
